# Supplementary material for: Lung immune signatures define two groups of end-stage IPF patients
Source: Respir Res. 2023 Sep 28;24:236. doi: 10.1186/s12931-023-02546-8 (PMC10540496; doi:10.1186/s12931-023-02546-8)
Supplement: Supplementary file 2 — Additional file 2: Table S1. Immune gene set signatures used in the GSVA pipeline to performed the unbiased clustering. Table S2. Extended gene set signatures with the epithelial and fibrosis associated signatures used in the GSVA to generate the correlation networks. Table S3. Hypergeometric test gene signatures for immune, epithelial and fibrosis related signatures. Table S4. Main clinical characteristics of D#1 y D#2. Table S5. Differences in immune cell signatures across clusters on D#1. Table S6. Differences in clinical characteristics and immune cell signatures across clusters on D#2. Table S7. Differences in clinical characteristics and immune cell signatures across clusters on D#1 filtering by upper lobes. Table S8. Differences in clinical characteristics and immune cell signatures across clusters on D#1 filtering by lower lobes. Table S9. Differences in clinical characteristics and immune cell signatures between upper and lower lobe. Results are expressed as median [95% coefficient interval] or mean (SD) as appropriate. Table S10. Main clinical characteristics of the validation cohort. Table S11. Statistically significant (adjusted p-value < 0.05) genes on the limma test of cluster 2 over cluster 1. Table S12. Gene ontologies enrichment of differentially express genes between the 2 clusters. On the left side the gene ontologies of the cluster 1 are represented (negative values of LgFC Cluster 2/Cluster1), on the right side the gene ontologies of the cluster 2 are represented (positive values of LgFC Cluster 2/Cluster1). [file 12931_2023_2546_MOESM2_ESM.xlsx]

## Sheet: Legend
	Table	S1	Gene sets GSVA 2015
	Table	S2	Gene sets GSVA of immune population and epithelial lineage.
	Table	S3	Hypergeometric test gene signatures
	Table	S4	Clinical characteristics D1 and D2
	Table	S5	Differences in the immune signatures on D1 GSVA
	Table	S6	Differences in the immune signatures and clinical characteristics between clusters on D2
	Table	S7	Clinical differences and GSV scores across IPF groups on D1 filtered by upper lobes
	Table	S8	Clinical differences and GSV scores across IPF groups on D1 filtered by lower lobes
	Table	S9	Clinical and GSVA score comparison between upper and lower lobe
	Table	S10	Clinical characteristics of the validation cohort
	Table	S11	Limma test of differentially express genes cluster 2 over cluster 1
	Table	S12	Gene ontologies enrichment of differentially express genes betwen the 2 clusters

## Sheet: Table S1
Gene sets GSVA 2015
Dataset number	n_symbol_gs	Gene_set_name	symbols
1	18	Activated B cells	AKNA	ARHGAP25	CCL21	CD180	CD2	CD27	CD37	CD38	CLEC17A	CLEC9A	CLECL1	FAIM3	FAM65B	GIMAP4	MAP4K1	PAX5	TNFRSF17	TRAF3IP3
2	35	Activated CD4	ANLN	BRIP1	BUB1B	CASC5	CCNB1	CCNB2	CCNE2	CEP55	CKAP2L	DLGAP5	DTL	E2F8	ECT2	ESCO2	EXO1	EXOC6	FBXO5	FIGNL1	HELLS	HMMR	IARS	KIF11	KIF18A	KIF20A	KNTC1	MAD2L1	MASTL	MTHFD2	NCAPG2	NCAPH	NEIL3	NUF2	PRC1	PSAT1	RTKN2
3	24	Activated CD8	ADRM1	AHSA1	C1GALT1C1	CCT5	CCT6B	CETN3	CSE1L	EIF2S1	GAL	GEMIN6	GPT2	KIAA0101	MND1	MPZL1	MRPS16	PCNA	PTRH2	RFC5	SPC25	TIMM13	TIMM8B	TK1	TUBB	TXNDC17
4	21	Central memory CD4	ADAM19	AHNAK	AIM2	COL4A1	CYLD	DPEP2	EPHA4	FYN	IL6R	IPCEF1	KLF10	MAL	MALT1	NXN	OPTN	PLCL2	PNRC1	SMAD4	SPOCK2	TRIB2	TXK
5	18	Central memory CD8	ADAM23	ATP2B4	BCL2L11	CD300A	CD80	CHN1	F2R	F8	GABARAPL1	GPR183	KLRK1	MSC	PYHIN1	RCAN2	RGS1	SLAMF1	SLFN11	ZEB2
6	9	Cytotoxic cells	BST2	BTN3A2	IL10RA	KLRB1	LAT2	LILRA2	SELL	SLAMF6	SLAMF7
7	34	DC	C1QC	CCDC88A	CCL13	CCL3L1	CCL3L3	CD300E	CD86	CLEC1A	CLEC4C	CLEC5A	CLIC2	CSF2RA	FAM49A	FCGR1A	FN1	FSTL1	GPR109B	GPX3	HLA-DQA2	INHBA	LGMN	NGFR	PDGFRL	PDPN	PRKAR2B	SIGLEC1	SIGLEC5	SLAMF9	STAB1	THBD	TNFAIP2	TTYH2	UBD	VCAM1
8	14	Effector memory CD4	BMI1	CASP3	CNOT10	COPB2	DARS	EXOSC9	EZH2	GDE1	IFT74	KLF5	NDUFB9	NUP205	SHCBP1	XRCC6
9	42	Effector memory CD8	APOBEC3H	ARHGAP10	ATP10D	BIRC3	C3AR1	CCL4	CD244	CD55	CFLAR	CMKLR1	DAPP1	DFNB31	DRAM1	EFNA5	FCGR2C	FCGR3A	FCRL6	FGR	GPR114	GZMH	HAPLN3	HLA-DMB	HLA-DPA1	HLA-DPB1	IFI16	IKZF2	IL15	IL2RB	JAKMIP1	KLRD1	LY96	NFKBIA	PLXNC1	PPP4R1	PTPN22	RGS18	SETD7	SH2D1B	SLA2	STXBP1	TLR5	TYROBP
10	15	Eosinophil	CCL24	CFD	CREB3	EGR1	EPX	FBXO16	HFE	HIVEP1	HIVEP2	MBP	PRNP	RNASE2	RNASE3	S100A4	SIGLEC8
11	21	iDC	ATP6V1A	C1QB	CHST11	CSF1	DPYD	FNDC3B	GRP	IL1RN	INPP5F	LPL	LPXN	MMD	PLAU	PLCB2	RAB38	RDX	RRAGD	TACSTD2	TGM2	TIMD4	TM7SF4
12	24	Immature B cells	BANK1	CD22	CYBB	ETS1	FAM129C	FCRL1	FCRL2	FCRL3	FCRL5	FCRLA	HDAC9	HLA-DOB	HLA-DQA1	HVCN1	KIAA0226	NCF1	NCF1B	P2RY10	PNOC	SP100	STAP1	TAGAP	TXNIP	ZCCHC2
13	22	Macrophages	AIF1	CCL1	CCL14	CCL26	CD163	CD300LB	CNR1	CNR2	CPM	CSF3R	ENG	FCAR	IGF1	IL34	L1CAM	LILRA1	LILRA5	LRP1	MS4A7	MS4A8B	TREM1	TREML1
14	42	Mast cells	ACSL4	ADAMTS3	ADCYAP1	ARHGAP15	ATP8B4	C19orf59	CASQ1	CLC	CMA1	CPA3	CTSG	DUSP14	EGR3	EMR1	FST	HDC	HEY1	KRT1	LXN	MEIS2	MS4A2	MS4A3	NLRP3	NTRK1	PLAT	PTGS1	PTGS2	RGS16	SCG2	SDPR	SERPINB2	SIGLEC14	SIGLEC6	SLC18A2	SLC24A3	TAL1	TARP	TIE1	TIMP1	TNFAIP6	TSPAN4	VAT1
15	8	mDC	ATP5O	CBX1	DNAJC15	ENSA	FOXN3	PRCP	SSB	TPMT
16	85	MDSC	ADORA3	AG2	ARG1	BIN2	C1orf162	CAPS	CD117	CD11B	CD11C	CD124	CD14	CD15	CD163L1	CD1D1	CD21	CD23	CD274	CD31	CD35	CD40	CD43	CD44	CD66B	COX2	CR2	CTR9	EBP	FAM48A	FAM70B	FCER2	FCGRT	FERMT3	FLOT1	FLT1	GIMAP7	GLI4	GNA15	GPR34	GPSM3	HLA-DR	IDO	IKZF1	IL12	IL13	IL18BP	IL1R	IL4RA
17	14	Memory B cells	AICDA	CCNA2	CDKN3	CLCN5	ENPP1	FCER1A	FCRL4	MYC	RUNX2	SORL1	SOX5	STAT5A	STAT5B	TLR9
18	25	Monocytes	ACTR3	ANXA5	ARPC2	ATP6V1B2	BASP1	CD300LF	DAZAP2	EIF4A1	EIF4G2	EMP3	FCN1	FTL	GABARAP	HIF1A	LITAF	NCOA4	OLR1	RAB1A	RHOA	SAT1	SDCBP	SRGN	TEK	TMBIM6	UBE2D3
19	16	Neutrophils	ABTB1	AMPD2	CAMP	EMR4P	FPR1	FPR2	GPR77	MAEA	PROK2	SEC14L1	SEPX1	SLC25A37	TNFSF14	TREML4	VNN2	XPO6
20	17	NK	AKT3	AXL	CDH2	CRTAM	CYTH1	FASLG	GRB2	KLRG1	LILRB5	LST1	MAPK4	NOTCH3	PIK3CG	PILRA	PLCG2	SIGLEC7	SIGLEC9
21	8	NK56 bright	C11orf75	DYNLL1	HCP5	HDGFRP2	KRT86	MLST8	MYL6B	TAX1BP3
22	17	NK56 dim	AKR7A3	CLTB	FAM27A	GLS2	GPRC5C	GRIN1	HLA-E	KIR2DS4	KLHL21	KRT80	MPL	PHRF1	PORCN	PQBP1	PSMC4	TEX264	UPP1
23	12	NKT	BTN2A2	CD101	GNLY	KIR2DL1	KIR2DL3	KIR3DL1	KIR3DL2	KLRC1	MICB	NCR1	NFATC2IP	TNFRSF11A
24	18	pDC	CBX6	DAB2	DDX17	HIGD1A	IDH3A	IL3RA	MAGED1	NUCB2	OFD1	OGT	PDIA4	SERTAD2	SIRPA	SPCS3	TMED2	TMX1	UGCG	ZDHHC17
25	86	T cells	BATF	BTLA	CCL11	CCL17	CCL22	CCL3	CCL5	CCL7	CCR1	CCR3	CCR4	CCR8	CD1A	CD1B	CD1C	CD1D	CD1E	CD247	CD28	CD3D	CD3E	CD3G	CD69	CD8A	CXCR1	CXCR4	CXCR5	CXCR6	FGFBP2	FLT3	FOSL1	GRAP2	HLA-DRA	HLA-DRB1	HLA-DRB5	HRH2	IFNG	IL10	IL12B	IL12RB1	IL12RB2	IL18R1	IL18RAP	IL1B	IL21	IL21R	IL24
26	10	TFH	B3GAT1	BCL6	CCR7	CD200	CD83	CD84	CDK5R1	FGF2	GPR18	PDCD1
27	43	TGD	ACP5	C1orf54	CARD8	CCL18	CD209	CD33	CECR1	CLEC10A	CLEC4A	CSF1R	FCER1G	FCGR2A	FCGR2B	FCGR3B	FGF7	FGL2	FPR3	GM2A	GPNMB	HCK	HK3	LIPA	MARCO	MMP12	MNDA	MRC1	MS4A6A	NPL	PLA2G7	PLEK	RAB23	RNASE6	SDC2	SLAMF8	SLC15A3	SLC38A6	SLC7A7	SPP1	TFEC	TM6SF1	TNFSF8	TREM2	TRPV2
28	37	Th1	ADAM8	CCR5	CD151	CD48	CD52	CD53	CD6	CD68	CD7	CD96	CD97	EBI3	GPR84	HAVCR2	ICAM1	ICAM3	IGSF6	IL12A	IL7R	IRF1	ITGA4	ITGAM	ITGAX	ITGB2	ITGB4	ITGB7	LTA	LTB	METRNL	P2RX5	PTPRC	SPN	TBX21	TLR6	TNFRSF1A	TNFRSF9	TRAT1
29	26	Th17	ABP1	B4GALNT4	C2CD4A	C2CD4B	CA2	CCDC65	CEACAM3	CHRM3	DOC2B	F12	FURIN	GPR25	IL17A	IL17C	IL17F	IL17RC	IL17RE	IL23A	ILDR1	LONRF3	LTK	MOCOS	SH2D6	TNIP2	TRAF3IP2	YBX2
30	25	Th2	ASB2	CALD1	CCR2	CSRP2	DAPK1	DLC1	DNAJC12	DUSP6	GATA3	GNAI1	HTR2B	LAMP3	NRP2	OSBPL1A	PDE4B	PHLDA1	PLA2G4A	RAB27B	RBMS3	RNF125	SIGLEC10	SKAP1	SMAD2	TMPRSS3	UBASH3A
31	26	Treg	CCL19	CD34	CD72	CTLA4	FOXP3	GADD45B	GEM	IL1RL1	IL9R	MADCAM1	MYH10	NCF2	RCSD1	RYR1	SELE	SELP	SFRP1	SIT1	TIGIT	TLR10	TLR2	TLR7	TLR8	TRAF1	WIPF1	TGFB1
[truncated: 39 more columns]

## Sheet: Table S2
Gene sets GSVA of immune population and epithelial lineage.
Dataset number	n_symbol_gs	Gene_set_name	symbols
1	18	Activated B cells	AKNA	ARHGAP25	CCL21	CD180	CD2	CD27	CD37	CD38	CLEC17A	CLEC9A	CLECL1	FAIM3	FAM65B	GIMAP4	MAP4K1	PAX5	TNFRSF17	TRAF3IP3
2	35	Activated CD4	ANLN	BRIP1	BUB1B	CASC5	CCNB1	CCNB2	CCNE2	CEP55	CKAP2L	DLGAP5	DTL	E2F8	ECT2	ESCO2	EXO1	EXOC6	FBXO5	FIGNL1	HELLS	HMMR	IARS	KIF11	KIF18A	KIF20A	KNTC1	MAD2L1	MASTL	MTHFD2	NCAPG2	NCAPH	NEIL3	NUF2	PRC1	PSAT1	RTKN2
3	24	Activated CD8	ADRM1	AHSA1	C1GALT1C1	CCT5	CCT6B	CETN3	CSE1L	EIF2S1	GAL	GEMIN6	GPT2	KIAA0101	MND1	MPZL1	MRPS16	PCNA	PTRH2	RFC5	SPC25	TIMM13	TIMM8B	TK1	TUBB	TXNDC17
4	21	Central memory CD4	ADAM19	AHNAK	AIM2	COL4A1	CYLD	DPEP2	EPHA4	FYN	IL6R	IPCEF1	KLF10	MAL	MALT1	NXN	OPTN	PLCL2	PNRC1	SMAD4	SPOCK2	TRIB2	TXK
5	18	Central memory CD8	ADAM23	ATP2B4	BCL2L11	CD300A	CD80	CHN1	F2R	F8	GABARAPL1	GPR183	KLRK1	MSC	PYHIN1	RCAN2	RGS1	SLAMF1	SLFN11	ZEB2
6	9	Cytotoxic cells	BST2	BTN3A2	IL10RA	KLRB1	LAT2	LILRA2	SELL	SLAMF6	SLAMF7
7	34	DC	C1QC	CCDC88A	CCL13	CCL3L1	CCL3L3	CD300E	CD86	CLEC1A	CLEC4C	CLEC5A	CLIC2	CSF2RA	FAM49A	FCGR1A	FN1	FSTL1	GPR109B	GPX3	HLA-DQA2	INHBA	LGMN	NGFR	PDGFRL	PDPN	PRKAR2B	SIGLEC1	SIGLEC5	SLAMF9	STAB1	THBD	TNFAIP2	TTYH2	UBD	VCAM1
8	14	Effector memory CD4	BMI1	CASP3	CNOT10	COPB2	DARS	EXOSC9	EZH2	GDE1	IFT74	KLF5	NDUFB9	NUP205	SHCBP1	XRCC6
9	42	Effector memory CD8	APOBEC3H	ARHGAP10	ATP10D	BIRC3	C3AR1	CCL4	CD244	CD55	CFLAR	CMKLR1	DAPP1	DFNB31	DRAM1	EFNA5	FCGR2C	FCGR3A	FCRL6	FGR	GPR114	GZMH	HAPLN3	HLA-DMB	HLA-DPA1	HLA-DPB1	IFI16	IKZF2	IL15	IL2RB	JAKMIP1	KLRD1	LY96	NFKBIA	PLXNC1	PPP4R1	PTPN22	RGS18	SETD7	SH2D1B	SLA2	STXBP1	TLR5	TYROBP
10	15	Eosinophil	CCL24	CFD	CREB3	EGR1	EPX	FBXO16	HFE	HIVEP1	HIVEP2	MBP	PRNP	RNASE2	RNASE3	S100A4	SIGLEC8
11	21	iDC	ATP6V1A	C1QB	CHST11	CSF1	DPYD	FNDC3B	GRP	IL1RN	INPP5F	LPL	LPXN	MMD	PLAU	PLCB2	RAB38	RDX	RRAGD	TACSTD2	TGM2	TIMD4	TM7SF4
12	24	Immature B cells	BANK1	CD22	CYBB	ETS1	FAM129C	FCRL1	FCRL2	FCRL3	FCRL5	FCRLA	HDAC9	HLA-DOB	HLA-DQA1	HVCN1	KIAA0226	NCF1	NCF1B	P2RY10	PNOC	SP100	STAP1	TAGAP	TXNIP	ZCCHC2
13	22	Macrophages	AIF1	CCL1	CCL14	CCL26	CD163	CD300LB	CNR1	CNR2	CPM	CSF3R	ENG	FCAR	IGF1	IL34	L1CAM	LILRA1	LILRA5	LRP1	MS4A7	MS4A8B	TREM1	TREML1
14	42	Mast cells	ACSL4	ADAMTS3	ADCYAP1	ARHGAP15	ATP8B4	C19orf59	CASQ1	CLC	CMA1	CPA3	CTSG	DUSP14	EGR3	EMR1	FST	HDC	HEY1	KRT1	LXN	MEIS2	MS4A2	MS4A3	NLRP3	NTRK1	PLAT	PTGS1	PTGS2	RGS16	SCG2	SDPR	SERPINB2	SIGLEC14	SIGLEC6	SLC18A2	SLC24A3	TAL1	TARP	TIE1	TIMP1	TNFAIP6	TSPAN4	VAT1
15	8	mDC	ATP5O	CBX1	DNAJC15	ENSA	FOXN3	PRCP	SSB	TPMT
16	85	MDSC	ADORA3	AG2	ARG1	BIN2	C1orf162	CAPS	CD117	CD11B	CD11C	CD124	CD14	CD15	CD163L1	CD1D1	CD21	CD23	CD274	CD31	CD35	CD40	CD43	CD44	CD66B	COX2	CR2	CTR9	EBP	FAM48A	FAM70B	FCER2	FCGRT	FERMT3	FLOT1	FLT1	GIMAP7	GLI4	GNA15	GPR34	GPSM3	HLA-DR	IDO	IKZF1	IL12	IL13	IL18BP	IL1R	IL4RA
17	14	Memory B cells	AICDA	CCNA2	CDKN3	CLCN5	ENPP1	FCER1A	FCRL4	MYC	RUNX2	SORL1	SOX5	STAT5A	STAT5B	TLR9
18	25	Monocytes	ACTR3	ANXA5	ARPC2	ATP6V1B2	BASP1	CD300LF	DAZAP2	EIF4A1	EIF4G2	EMP3	FCN1	FTL	GABARAP	HIF1A	LITAF	NCOA4	OLR1	RAB1A	RHOA	SAT1	SDCBP	SRGN	TEK	TMBIM6	UBE2D3
19	16	Neutrophils	ABTB1	AMPD2	CAMP	EMR4P	FPR1	FPR2	GPR77	MAEA	PROK2	SEC14L1	SEPX1	SLC25A37	TNFSF14	TREML4	VNN2	XPO6
20	17	NK	AKT3	AXL	CDH2	CRTAM	CYTH1	FASLG	GRB2	KLRG1	LILRB5	LST1	MAPK4	NOTCH3	PIK3CG	PILRA	PLCG2	SIGLEC7	SIGLEC9
21	8	NK56 bright	C11orf75	DYNLL1	HCP5	HDGFRP2	KRT86	MLST8	MYL6B	TAX1BP3
22	17	NK56 dim	AKR7A3	CLTB	FAM27A	GLS2	GPRC5C	GRIN1	HLA-E	KIR2DS4	KLHL21	KRT80	MPL	PHRF1	PORCN	PQBP1	PSMC4	TEX264	UPP1
23	12	NKT	BTN2A2	CD101	GNLY	KIR2DL1	KIR2DL3	KIR3DL1	KIR3DL2	KLRC1	MICB	NCR1	NFATC2IP	TNFRSF11A
24	18	pDC	CBX6	DAB2	DDX17	HIGD1A	IDH3A	IL3RA	MAGED1	NUCB2	OFD1	OGT	PDIA4	SERTAD2	SIRPA	SPCS3	TMED2	TMX1	UGCG	ZDHHC17
25	86	T cells	BATF	BTLA	CCL11	CCL17	CCL22	CCL3	CCL5	CCL7	CCR1	CCR3	CCR4	CCR8	CD1A	CD1B	CD1C	CD1D	CD1E	CD247	CD28	CD3D	CD3E	CD3G	CD69	CD8A	CXCR1	CXCR4	CXCR5	CXCR6	FGFBP2	FLT3	FOSL1	GRAP2	HLA-DRA	HLA-DRB1	HLA-DRB5	HRH2	IFNG	IL10	IL12B	IL12RB1	IL12RB2	IL18R1	IL18RAP	IL1B	IL21	IL21R	IL24
26	10	TFH	B3GAT1	BCL6	CCR7	CD200	CD83	CD84	CDK5R1	FGF2	GPR18	PDCD1
27	43	TGD	ACP5	C1orf54	CARD8	CCL18	CD209	CD33	CECR1	CLEC10A	CLEC4A	CSF1R	FCER1G	FCGR2A	FCGR2B	FCGR3B	FGF7	FGL2	FPR3	GM2A	GPNMB	HCK	HK3	LIPA	MARCO	MMP12	MNDA	MRC1	MS4A6A	NPL	PLA2G7	PLEK	RAB23	RNASE6	SDC2	SLAMF8	SLC15A3	SLC38A6	SLC7A7	SPP1	TFEC	TM6SF1	TNFSF8	TREM2	TRPV2
28	37	Th1	ADAM8	CCR5	CD151	CD48	CD52	CD53	CD6	CD68	CD7	CD96	CD97	EBI3	GPR84	HAVCR2	ICAM1	ICAM3	IGSF6	IL12A	IL7R	IRF1	ITGA4	ITGAM	ITGAX	ITGB2	ITGB4	ITGB7	LTA	LTB	METRNL	P2RX5	PTPRC	SPN	TBX21	TLR6	TNFRSF1A	TNFRSF9	TRAT1
29	26	Th17	ABP1	B4GALNT4	C2CD4A	C2CD4B	CA2	CCDC65	CEACAM3	CHRM3	DOC2B	F12	FURIN	GPR25	IL17A	IL17C	IL17F	IL17RC	IL17RE	IL23A	ILDR1	LONRF3	LTK	MOCOS	SH2D6	TNIP2	TRAF3IP2	YBX2
30	25	Th2	ASB2	CALD1	CCR2	CSRP2	DAPK1	DLC1	DNAJC12	DUSP6	GATA3	GNAI1	HTR2B	LAMP3	NRP2	OSBPL1A	PDE4B	PHLDA1	PLA2G4A	RAB27B	RBMS3	RNF125	SIGLEC10	SKAP1	SMAD2	TMPRSS3	UBASH3A
31	26	Treg	CCL19	CD34	CD72	CTLA4	FOXP3	GADD45B	GEM	IL1RL1	IL9R	MADCAM1	MYH10	NCF2	RCSD1	RYR1	SELE	SELP	SFRP1	SIT1	TIGIT	TLR10	TLR2	TLR7	TLR8	TRAF1	WIPF1
32	84	Ciliated	AC007906.2	AC009502.1	AC023157.3	ADPRHL2	AGBL4	AHI1	AL355075.4	AL357093.2	ALDH1A1	ANKRD18A	B2M	C11orf88	C12orf75	C1orf194	C20orf85	C2orf40	C5orf49	C9orf116	C9orf24	CABCOCO1	CALM2	CAPSL	CCDC146	CCDC153	CCDC17	CCDC170	CCDC189	CCDC78	CD24	CD59	CETN2	CFAP157	CFAP299	CSKMT	DNAAF1	DNAH12	DNAH9	DRC3	DSTN	DYNLRB2	EFCAB1	FAM183A	FAM229B	FAM92B	FTH1	GSTA1	GSTA2
33	70	Basal_Cells	ADIRF	APOBEC3A	AREG	ARID5B	ATF3	ATP1B3	BCAM	BIRC5	C1orf56	CASC15	CAV1	CDC20	CENPW	CLDN4	CTGF	CXCL17	CYR61	DDIT4	DKK1	DST	DUSP1	ETS2	FHL2	FOS	FOSB	G0S2	GDF15	GSN	HBEGF	HES1	HIST1H4C	HSPA1A	HSPA1B	ID1	IER2	IFITM3	JUN	JUNB	KRT14	KRT15	KRT16	KRT5	LINC00511	LMO7	MDK	MKI67	MMP10
34	30	Epithelial	AGER	AGR3	BGN	BPIFB1	CEACAM6	CTSH	CYB5A	ELF3	FXYD3	HIGD1B	HOPX	KRT19	KRT7	KRT8	NAPSA	RGN	RRAD	SCGB3A2	SFTA2	SFTPA1	SFTPA2	SFTPB	SFTPC	SFTPD	SLC34A2	SLPI	TBX2	TBX3	TMEM106C	WFDC2
35	55	Secretory_Cells	AC020656.1	AGR2	ALDH3A1	ANKRD36C	AQP3	AZGP1	BPIFA1	BPIFB2	C6orf58	CHI3L1	CST3	DEFB1	DMBT1	EMP1	FAM3D	FCGBP	FOLR1	GALE	GLUL	GLYATL2	GPX2	HMGA1	HP	KRT17	KRT6A	LCN2	LTF	LYZ	MALAT1	MSMB	MUC5AC	MUC5B	PART1	PIGR	PIP	PLAC8	PRB3	PRB4	RASD1	S100A1	S100A10	S100A2	SAA1	SCGB1A1	SCGB3A1	SERPINB1	SERPINB4
36	19	Serous_Cells	AC006518.7	AL049839.2	CRISP3	FDCSP	LPO	NDRG2	ODAM	PI3	PPP1R1B	PRB1	PRB2	PRH2	PRR4	RARRES1	S100B	SAA2	SELENOM	STATH	ZG16B
37	69	EMT	ANKRD22	ANTXR2	AP1M2	BSPRY	C1orf116	C1orf172	C3orf21	CARD6	CDH1	CDH3	CDS1	CLDN7	CRB3	DSP	ELMO3	PRR5	ENPP5	EPHA1	EPN3	EPPK1	ERBB3	EVPL	F11R	GALNT3	GALNT5	GPR110	GRHL1	GRHL2	GRP56	HNMT	INADL	ITGB6	KLC3	KRTCAP3	LIX1L	LRRC54	MAL2	MAPK13	MMP2	MPP7	MPZL2	MTAC2D1	NRP1	PPARG	PPRSS22	PRSS8	RAB25
38	47	Pericytes	ACTA2	C11orf96	C1QA	CD74	COL4A2	COTL1	COX4I2	CPE	CRISPLD2	CTSC	CTSD	EGFL6	FAM162B	GJA4	HLA-DQB1	IGFBP2	IGFBP5	IGFBP7	LGALS1	LGI4	LHFP	LSP1	MAP1B	MFGE8	MT1A	MT1M	MT2A	MYL9	NDUFA4L2	NR2F1	NR2F2	NR4A1	PAG1	PDGFRB	PEAR1	TPM1	PPP1R14A	PRKG1	PTN	RGS5	RND3	SPARCL1	TACC1	TAGLN	TINAGL1	TPM2	VSIG4
39	19	Fibroblastos	LUM	DCN	FBLN1	ADH1B	COL1A1	COL1A2	APOD	RARRES2	COL3A1	COL6A3	PLA2G2A	MGP	CCDC80	C3	PTGDS	IGFBP6	SFRP2	A2M	LAMA2
40	17	Pirfenidone response	MERTK	GDF11	ZNF215	OR8B8	CACNA2D1	ADCYAP1R1	SPAG4	MZB1	TTYH1	LOC102723617	ZNF184	HNF1A-AS1	C4BPB	MIA2	ACSM1	C11orf21	EPB41L5
41	22	G0_earlyG1	CCNA1	CCNE1	CDC25A	CDC6	CDK1	CDK2	DYRK1A	E2F1	E2F4	E2F5	HDAC1	LIN37	LIN52	LIN54	LIN9	LOC441488	MYBL2	RBBP4	RBBP4P1	RBL1	RBL2	TFDP1
42	166	G1_S_cycle	ABCA5	ABHD10	ABHD4	ACYP1	ADAMTS1	ADCK2	ADCY6	AKAP5	AMIGO2	ANK3	ANKRA2	AP3M2	ARGLU1	ARL6IP6	ASPH	ATAD2	BARD1	BBX	BLM	BRCA1	C1GALT1	C8orf4	CASP2	CASP8AP2	CCND3	CDC7	CDCA7	CDH10	CDH24	CDT1	CENPQ	CHAF1A	CHAF1B	CHEK1	CLSPN	CNNM3	COL4A4	DCLRE1A	DCLRE1B	DLGAP1	DNAJC3	DNAJC6	DSCC1	DUSP10	E2F2	FAM111B	FANCE
43	188	G2_M_cycle	AMD1	ANP32E	ANXA3	ARHGAP11A	ARHGAP19	ARL4A	ARL6IP1	ASPM	ATF7IP	AURKA	AURKB	BAG3	BCAR3	BMP2	BRD8	BTBD3	BTG1	BUB1	BUB3	CABYR	CCNF	CDC25B	CDC25C	CDC27	CDC42EP4	CDCA2	CDCA3	CDCA8	CDKL5	CDKN1B	CDKN2C	CDKN2D	CDR2	CENPA	CENPE	CENPF	CENPL	CEP350	CEP70	CHEK2	CIT	CKAP2	CKAP5	CKS1B	CKS2	CLK4	CNTROB
44	53	Senescence	NFIA	EFNB3	GSTM4	SPATA6	MEIS1	PATZ1	USP6NL	ARHGAP35	ASCC1	CREBBP	ZC3H4	ARID2	ICE1	PDS5B	SPIN4	TRDMT1	C1CD4	STAG1	RHNO1	PCIF1	CNTLN	KCTD3	SMO	GDNF	PLK3	SLC16A3	TSPAN13	CCND1	P4HA2	SLC10A3	ZBTB7A	SCOC	UFM1	B4GALT7	ACADVL	POFUT2	TAF13	NOL3	ADBPGK	DDA1	ZNHIT1	CHMP5	TOLLIP	KLC1	TMEM87B	BCL2L2	DYNLT3
45	24	resp_virus	AP1S2	APOBEC3B	APOBEC3C	APOBEC3G	BCL3	CARD9	CD4	CXCL9	DDX21	EEF1G	GBP1	IFITM1	IFITM2	IRF7	IRF9	ISG20	LYST	MEF2C	MX2	OAS1	PMAIP1	SPON2	TSPAN32	UNC93B1
46	21	wnt_biocarta_path	APC	AXIN1	BTRC	CSNK1A1	CSNK1D	CSNK2A1	CTBP1	CTNNB1	DVL1	FRAT1	FZD1	GSK3B	LEF1	MAP3K7	NLK	PPARD	PPP2CA	TAB1	TLE1	WIF1	WNT1
47	38	yu_myc_targets_dn	ABCA1	ARHGEF1	ARID3B	BLK	C22orf13	CMAHP	ERO1LB	EVL	GAD1	GBP4	GDI1	GGA2	GNS	HLA-DMA	HMHA1	KLF2	KLF3	LAPTM5	LIFR	LOC645638	MACF1	MAP4K2	MGST1	MS4A1	MYO7A	OLFM1	PLD4	PRKCB	PYGM	RAG1	RBMS1	RGL2	SIPA1	SLFN12L	SPIB	SRPK3	SSPN	TXNDC16
48	15	yu_myc_targets_up	BRCA2	CLIC4	CSDA	DCTPP1	DFNA5	FAM136A	FDPS	HNRPLL	IDI1	NUDCD2	NUP54	RRM1	STRAP	TXN	UCHL5
[truncated: 141 more columns]

## Sheet: Table S3
Hypergeometric test gene signatures
Biological process	n of genes
cluster_A	129	AGBL2	ARMC3	ARMC4	C10orf107	C10orf79	C11orf70	C11orf88	C12orf55	C12orf63	C13orf30	C1orf129	C1orf173	C1orf192	C1orf194	C1orf87	C20orf26	C20orf85	C2orf39	C2orf77	C3orf15	C6	C6orf103	C6orf118	C6orf165	C6orf97	C9orf135	CAPS	CAPSL	CASC1	CCDC11	CCDC113	CCDC146	CCDC39	CCDC60	CDHR3	CERKL	CXorf22	CXorf59	DNAH10	DNAH10	DNAH11	DNAH12	DNAH12	DNAH12	DNAH3	DNAH5	DNAH6	DNAH6
cluster_B	83	ABCA13	ADAM28	ADH7	AGR2	AGR3	ALOX15	ANKRD18B	C10orf81	C12orf75	C1orf110	C20orf114	C7orf63	CAPN13	CD24	CDH3	CHST9	CKMT1A	CKMT1A	CLCA2	CLDN1	CLIC6	CNTN3	COL17A1	CP	CRISPLD1	CXCL13	CYP24A1	DNAH5	DNAJA4	DSC3	FAT2	FGF14	GOLM1	GPR110	GSTA1	HHLA2	HSPA4L	ITGB8	KIAA1324	KIAA1377	KLHL13	KRT15	KRT17	KRT5	KRT6C	LCN2	MAP1A	MMP1
Aberrant_Basaloid	10	CASC15	MMP7	KRT17	KRT7	KRT19	LINC00511	NTM	GDF15	PALLD	PTPRK
Ciliated	10	DNAH12	CFAP299	RP1	AGBL4	CAPS	HYDIN	TPPP3	RSPH1	DNAH9	LRRIQ1
Ciliated_16	10	CAPS	TMEM190	TPPP3	C9orf24	C20orf85	TSPAN1	FAM183A	C1orf194	AGR3	RSPH1
Epi_11	27	SFTPC	SCGB1A1	SCGB3A1	SFTPB	SLPI	SCGB3A2	SFTPA2	SFTPA1	NAPSA	RNASE1	BPIFB1	KRT19	WFDC2	SFTA2	AGER	KRT7	HOPX	AGR3	SFTPD	TACSTD2	ELF3	KRT8	FXYD3	CEACAM6	CYB5A	CTSH	SLC34A2
Alveolar_10	10	CCL11	CPM	RRAD	HIGD1B	TBX2	COL6A3	RGN	TMEM106C	BGN	TBX3
Diff_cil_18	19	SCGB1A1	SCGB3A1	CDC20B	BPIFB1	LCN2	WFDC2	MSMB	SAA1	SCGB3A2	CCNO	SLPI	TFF3	AGR2	PIGR	C20orf85	MUC5B	SAA2	FAM183A	TPPP3
Ciliated_0	44	CAPS	C20orf85	C9orf24	SNTN	TUBB4B	TSPAN1	RSPH1	C1orf194	TMEM190	FAM183A	PIFO	TPPP3	C2orf40	C9orf116	MORN2	GSTA1	DYNLRB2	CETN2	CD24	C5orf49	CCDC78	C11orf88	ODF3B	CAPSL	PRDX5	GSTA2	FAM92B	DNAH12	OMG	ZMYND10	EFCAB1	TUBA1A	MS4A8	ROPN1L	MORN5	RP11-295M3.4	CCDC170	DYNLL1	AGR3	RP11-356K23.1	LRRIQ1	SMIM22	FAM229B	CCDC146
MUC5Bpos_AT1_15	10	BPIFB1	SCGB3A1	SCGB1A1	LCN2	WFDC2	BPIFA1	MUC5B	MSMB	SLPI	SAA1
Ciliated_1	10	TPPP3	C9orf24	C20orf85	TMEM190	CAPS	FAM183A	C1orf194	SNTN	CFAP157	RSPH1
Basal_Cells	67	FOS	JUN	ZFP36	TUBA1B	JUNB	ID1	HIST1H4C	STMN1	IER2	ATF3	DUSP1	EGR1	SERPINB3	PTTG1	UBE2C	PCLAF	GADD45B	HSPA1A	TUBB	CLDN4	MMP10	KRT16	HSPA1B	PLAC8	PLAUR	SLPI	TK1	NFKBIA	GDF15	S100P	FOSB	HES1	SERPINB1	DDIT4	RAB11FIP1	SOCS3	CENPW	CDC20	FAM3D	GSN	CXCL17	TOP2A	BIRC5	LMO7	WFDC2	CTGF	MDK	APOBEC3A
Activated_basals	13	ID1	FOS	JUNB	EGR1	NFKBIA	ATF3	ZFP36	DUSP1	FOSB	KRT5	JUN	IER2	SOCS3
Secreted_Primed_basals	13	PLAUR	KRT16	EMP1	CLDN1	SERPINB1	SERPINB3	SERPINB4	CSTA	SFN	UNC5B-AS1	KRT13	APOBEC3A	SERPINB5
Proliferative_Basals	14	PTTG1	PCLAF	UBE2C	HMGB2	TK1	CENPW	CDC20	BIRC5	TOP2A	CENPF	NUSAP1	CDKN3	PBK	MKI67
Multipotent_Basal	26	MMP10	KRT15	PHLDA1	KRT5	DST	BCAM	TNFRSF12A	FHL2	SERPINF1	STK17A	ADIRF	ATP1B3	IFITM3	ARID5B	SFN	ETS2	HBEGF	PDLIM1	MYC	AREG	FST	KRT6A	CYR61	DKK1	KRT14	RGCC
Secretory_Cells	38	KRT17	SFN	S100A2	AQP3	SERPINB1	TACSTD2	ALDH3A1	KRT6A	SLC25A5	HMGA1	PLAC8	SERPINB4	GLUL	GPX2	S100A10	EMP1	MUC5AC	SCGB1A1	TFF3	VMO1	MUC5B	BPIFA1	BPIFB2	AZGP1	GLYATL2	TCN1	DMBT1	S100A1	PRB3	LYZ	LTF	PIP	AC020656.1	PRB4	CHI3L1	C6orf58	SCGB3A2	HP
Club_cells	8	SERPINB3	C15orf48	LYPD2	BPIFA1	SCGB1A1	S100P	AQP5	KRT7
Globet_cells	18	SCGB1A1	MSMB	BPIFA1	TFF3	MUC5AC	SCGB3A1	LCN2	MUC5B	VMO1	BPIFB1	AGR2	S100P	ANKRD36C	WFDC2	CXCL17	LYPD2	PLCG2	RARRES1
Mucous_cells	25	BPIFB2	AZGP1	MUC5B	MSMB	SFTPA2	TFF3	TCN1	SCGB3A1	TFF1	C6orf58	ANKRD36C	FCGBP	DEFB1	RASD1	XBP1	PIGR	FAM3D	CST3	MALAT1	TIMP1	TSPAN8	FOLR1	PART1	AGR2	GALE
Serous_1_Cells	17	STATH	FDCSP	SCGB3A1	MMP7	AZGP1	LTF	DEFB1	RARRES1	KRT7	DMBT1	PI3	AC020656.1	RNASE1	SAA2	FOLR1	MGP	TCN1
Serous_2_Cells	37	LYZ	PRB4	PRB3	PRR4	LTF	PRH2	PRB1	AC020656.1	ZG16B	PIP	FDCSP	BPIFB1	C6orf58	AZGP1	PRB2	STATH	SCGB3A2	HP	SAA2	CHI3L1	TCN1	S100A1	ODAM	MGP	S100B	DMBT1	CRISP3	RNASE1	AL049839.2	PIGR	PI3	AC006518.7	BPIFA1	SELENOM	NDRG2	PPP1R1B	LPO
Cilliated_cells	48	PLCG2	MALAT1	WDR60	PTRH1	SOX4	HES1	CD59	SARAF	PTGES3	CFAP157	TMEM59	ANKRD18A	CD24	C12orf75	AHI1	B2M	PFN2	AL355075.4	CALM2	VWA3A	CCDC189	SUMO2	DRC3	LRRC74B	S100A2	CETN2	HIST1H4C	ADPRHL2	H3F3A	SERPINF1	HEXIM1	FTH1	CABCOCO1	DSTN	CSKMT	OMG	FTL	ALDH1A1	SRP9	TOGARAM2	JUN	LRRIQ1	AC023157.3	IER2	CCDC17	AC009502.1	TTLL10	DNAH12
Cilliated_1_cells	24	OMG	C20orf85	TUBA1A	TPPP3	CETN2	MORN2	PIFO	C9orf24	CAPSL	SNTN	RSPH1	C1orf194	AGR3	C5orf49	AL357093.2	C9orf116	AC007906.2	C2orf40	C11orf88	DYNLL1	ROPN1L	FAM183A	DYNLRB2	C12orf75
Cilliated_2_cells	15	TMEM190	CFAP157	LRRIQ1	WDR60	DNAAF1	DRC3	CCDC78	CCDC17	DNAH12	PTRH1	ODF3B	CCDC189	FAM183A	C9orf24	CCDC153
Pirfenidone response	20	MERTK	GDF11	ZNF215	OR8B8	CACNA2D1	MYC	MZB1	TNFRSF17	ADCYAP1R1	SPAG4	FCRL5	TTYH1	LOC102723617	ZNF184	HNF1A-AS1	C4BPB	MIA2	ACSM1	C11orf21	EPB41L5
Fibrosis_fib total	20	LUM	DCN	FBLN1	CFD	ADH1B	COL1A1	COL1A2	APOD	RARRES2	COL3A1	COL6A3	PLA2G2A	MGP	CCDC80	C3	PTGDS	IGFBP6	SFRP2	A2M	LAMA2
Fibrosis_fib 23	10	LUM	COL3A1	A2M	COL1A2	COL1A1	PTGDS	DCN	ADH1B	MGP	COL6A3
Fibrosis_fib 19	10	DCN	SFRP2	PLA2G2A	CFD	FBLN1	COL1A2	CCDC80	IGFBP6	C3	PTGDS
Fibrosis_fib	10	DCN	PLA2G2A	MGP	CCDC80	CFD	FBLN1	IGFBP6	SFRP2	APOD	LAMA2
Fibrosis_fib 4	10	LUM	DCN	FBLN1	CFD	ADH1B	COL1A1	COL1A2	APOD	RARRES2	COL3A1
Pericytes_total	74	COX4I2	RGS5	NDUFA4L2	IGFBP5	HIGD1B	ACTA2	MYL9	FAM162B	BGN	MT1A	CALD1	RGS16	EGFL6	IGFBP2	PPP1R14A	TPM2	TAGLN	NOTCH3	NR2F2	CRISPLD2	PDGFRB	COL4A1	LHFP	IGFBP7	MFGE8	TACC1	CHN1	MAP1B	C1QA	LST1	GPX3	MT1M	CTSC	VSIG4	HLA-DPA1	HLA-DPB1	C11orf96	TPM1	MRC1	HLA-DRB1	LGI4	LYZ	PAG1	CD74	G0S2	MT2A	CPE	PEAR1
Pericytes	10	IGFBP7	CALD1	RGS5	COL4A1	CRISPLD2	SPARCL1	MYL9	PRKG1	COL4A2	TACC1
Pericytes 7	10	RGS5	COX4I2	HIGD1B	NDUFA4L2	IGFBP7	CALD1	RGS16	IGFBP2	MT1A	ACTA2
Pericytes 22	70	COX4I2	RGS5	NDUFA4L2	IGFBP5	HIGD1B	ACTA2	MYL9	FAM162B	BGN	MT1A	CALD1	RGS16	EGFL6	IGFBP2	PPP1R14A	TPM2	TAGLN	NOTCH3	NR2F2	CRISPLD2	PDGFRB	COL4A1	LHFP	IGFBP7	MFGE8	TACC1	CHN1	MAP1B	C1QA	LST1	GPX3	MT1M	CTSC	VSIG4	HLA-DPA1	HLA-DPB1	C11orf96	TPM1	MRC1	HLA-DRB1	LGI4	LYZ	PAG1	CD74	G0S2	MT2A	CPE	PEAR1
Pericytes 6	10	HIGD1B	NDUFA4L2	COX4I2	RGS5	PTN	FAM162B	GJA4	CHN1	EGFL6	COL4A2
EMT	74	ANKRD22	ANTXR2	AP1M2	BSPRY	C1orf116	C1orf172	C3orf21	CARD6	CDH1	CDH3	CDS1	CLDN4	CLDN7	CRB3	DSP	ELMO3	ENPP5	EPB41L5	EPHA1	EPN3	EPPK1	ERBB3	EVPL	F11R	FN1	FXYD3	GALNT3	GALNT5	GPR110	GRHL1	GRHL2	GRP56	HNMT	INADL	ITGB6	KLC3	KRT19	KRTCAP3	LIX1L	LRRC54	MAL2	MAPK13	MMP2	MPP7	MPZL2	MTAC2D1	NRP1	PPARG
G0_earlyG1	22	CCNA1	CCNE1	CDC25A	CDC6	CDK1	CDK2	DYRK1A	E2F1	E2F4	E2F5	HDAC1	LIN37	LIN52	LIN54	LIN9	LOC441488	MYBL2	RBBP4	RBBP4P1	RBL1	RBL2	TFDP1
G1_S_cycle	171	ABCA5	ABHD10	ABHD4	ACYP1	ADAMTS1	ADCK2	ADCY6	AHI1	AKAP5	AMIGO2	ANK3	ANKRA2	AP3M2	ARGLU1	ARID5B	ARL6IP6	ASPH	ATAD2	BARD1	BBX	BLM	BRCA1	C1GALT1	C8orf4	CASP2	CASP8AP2	CCND3	CDC7	CDCA7	CDH10	CDH24	CDT1	CENPQ	CHAF1A	CHAF1B	CHEK1	CLSPN	CNNM3	COL4A4	CYR61	DCLRE1A	DCLRE1B	DLGAP1	DNAJC3	DNAJC6	DSCC1	DUSP10	E2F2
G2_M_cycle	195	AMD1	ANP32E	ANXA3	ARHGAP11A	ARHGAP19	ARL4A	ARL6IP1	ASPM	ATF7IP	AURKA	AURKB	BAG3	BCAR3	BIRC5	BMP2	BRD8	BTBD3	BTG1	BUB1	BUB3	CABYR	CCNF	CDC20	CDC25B	CDC25C	CDC27	CDC42EP4	CDCA2	CDCA3	CDCA8	CDKL5	CDKN1B	CDKN2C	CDKN2D	CDR2	CENPA	CENPE	CENPF	CENPL	CEP350	CEP70	CHEK2	CIT	CKAP2	CKAP5	CKS1B	CKS2	CLK4
resp_virus	42	APOBEC3A	CXCR4	AP1S2	ISG20	IFITM2	MX2	CCL5	PTPRC	MEF2C	TSPAN32	IRF1	FYN	BCL3	CD86	LILRB1	FGR	DDX21	CD4	DDIT4	LYST	GBP1	PMAIP1	UNC93B1	EEF1G	HCK	APOBEC3G	STAT1	IRF7	IRF9	SEC14L1	CARD9	IFITM1	PRF1	APOBEC3C	CD247	CXCL9	LCK	OAS1	APOBEC3B	CCL19	IL15	SPON2
Senescence	53	NFIA	EFNB3	GSTM4	SPATA6	MEIS1	PATZ1	USP6NL	ARHGAP35	ASCC1	CREBBP	ZC3H4	ARID2	ICE1	PDS5B	SPIN4	TRDMT1	C1CD4	STAG1	RHNO1	PCIF1	CNTLN	KCTD3	SMO	GDNF	PLK3	SLC16A3	TSPAN13	CCND1	P4HA2	SLC10A3	ZBTB7A	SCOC	UFM1	B4GALT7	ACADVL	POFUT2	TAF13	NOL3	ADBPGK	DDA1	ZNHIT1	CHMP5	TOLLIP	KLC1	TMEM87B	BCL2L2	DYNLT3	RAI14
wnt_biocarta_path	21	APC	AXIN1	BTRC	CSNK1A1	CSNK1D	CSNK2A1	CTBP1	CTNNB1	DVL1	FRAT1	FZD1	GSK3B	LEF1	MAP3K7	NLK	PPARD	PPP2CA	TAB1	TLE1	WIF1	WNT1
yu_myc_targets_dn	41	ABCA1	ARHGEF1	ARID3B	BLK	C22orf13	CD74	CMAHP	CTSH	ERO1LB	EVL	GAD1	GBP4	GDI1	GGA2	GNS	HLA-DMA	HLA-DQB1	HMHA1	KLF2	KLF3	LAPTM5	LIFR	LOC645638	MACF1	MAP4K2	MGST1	MS4A1	MYO7A	OLFM1	PLD4	PRKCB	PYGM	RAG1	RBMS1	RGL2	SIPA1	SLFN12L	SPIB	SRPK3	SSPN	TXNDC16
yu_myc_targets_up	15	BRCA2	CLIC4	CSDA	DCTPP1	DFNA5	FAM136A	FDPS	HNRPLL	IDI1	NUDCD2	NUP54	RRM1	STRAP	TXN	UCHL5
Activ_T_cells	4	CD28	TNFRSF18	ICOS	CD27
Activated B cells	17	AKNA	ARHGAP25	CCL21	CD180	CD2	CD37	CD38	CLEC17A	CLEC9A	CLECL1	FAIM3	FAM65B	GIMAP4	MAP4K1	PAX5	TNFRSF17	TRAF3IP3
Activated CD4	35	ANLN	BRIP1	BUB1B	CASC5	CCNB1	CCNB2	CCNE2	CEP55	CKAP2L	DLGAP5	DTL	E2F8	ECT2	ESCO2	EXO1	EXOC6	FBXO5	FIGNL1	HELLS	HMMR	IARS	KIF11	KIF18A	KIF20A	KNTC1	MAD2L1	MASTL	MTHFD2	NCAPG2	NCAPH	NEIL3	NUF2	PRC1	PSAT1	RTKN2
Activated CD8	24	ADRM1	AHSA1	C1GALT1C1	CCT5	CCT6B	CETN3	CSE1L	EIF2S1	GAL	GEMIN6	GPT2	KIAA0101	MND1	MPZL1	MRPS16	PCNA	PTRH2	RFC5	SPC25	TIMM13	TIMM8B	TK1	TUBB	TXNDC17
Central memory CD4	20	ADAM19	AHNAK	AIM2	COL4A1	CYLD	DPEP2	EPHA4	IL6R	IPCEF1	KLF10	MAL	MALT1	NXN	OPTN	PLCL2	PNRC1	SMAD4	SPOCK2	TRIB2	TXK
Central memory CD8	17	ADAM23	ATP2B4	BCL2L11	CD300A	CHN1	F2R	F8	GABARAPL1	GPR183	KLRK1	MSC	PYHIN1	RCAN2	RGS1	SLAMF1	SLFN11	ZEB2
Cytotoxic cells	9	BST2	BTN3A2	IL10RA	KLRB1	LAT2	LILRA2	SELL	SLAMF6	SLAMF7
Effector memory CD4	14	BMI1	CASP3	CNOT10	COPB2	DARS	EXOSC9	EZH2	GDE1	IFT74	KLF5	NDUFB9	NUP205	SHCBP1	XRCC6
Effector memory CD8	39	APOBEC3H	ARHGAP10	ATP10D	BIRC3	C3AR1	CCL4	CD244	CD55	CFLAR	CMKLR1	DAPP1	DFNB31	DRAM1	EFNA5	FCGR2C	FCGR3A	FCRL6	GPR114	GZMH	HAPLN3	HLA-DMB	HLA-DPA1	HLA-DPB1	IFI16	IKZF2	IL2RB	JAKMIP1	KLRD1	NFKBIA	PLXNC1	PPP4R1	PTPN22	RGS18	SETD7	SH2D1B	SLA2	STXBP1	TLR5	TYROBP
Immature B cells	24	BANK1	CD22	CYBB	ETS1	FAM129C	FCRL1	FCRL2	FCRL3	FCRL5	FCRLA	HDAC9	HLA-DOB	HLA-DQA1	HVCN1	KIAA0226	NCF1	NCF1B	P2RY10	PNOC	SP100	STAP1	TAGAP	TXNIP	ZCCHC2
Memory B cells	14	AICDA	CCNA2	CDKN3	CLCN5	ENPP1	FCER1A	FCRL4	MYC	RUNX2	SORL1	SOX5	STAT5A	STAT5B	TLR9
NK	17	AKT3	AXL	CDH2	CRTAM	CYTH1	FASLG	GRB2	KLRG1	LILRB5	LST1	MAPK4	NOTCH3	PIK3CG	PILRA	PLCG2	SIGLEC7	SIGLEC9
NK56 bright	8	C11orf75	DYNLL1	HCP5	HDGFRP2	KRT86	MLST8	MYL6B	TAX1BP3
NK56 dim	17	AKR7A3	CLTB	FAM27A	GLS2	GPRC5C	GRIN1	HLA-E	KIR2DS4	KLHL21	KRT80	MPL	PHRF1	PORCN	PQBP1	PSMC4	TEX264	UPP1
NKT	12	BTN2A2	CD101	GNLY	KIR2DL1	KIR2DL3	KIR3DL1	KIR3DL2	KLRC1	MICB	NCR1	NFATC2IP	TNFRSF11A
TFH	9	B3GAT1	BCL6	CCR7	CD200	CD83	CD84	CDK5R1	FGF2	GPR18
TGD	41	ACP5	C1orf54	CARD8	CCL18	CD209	CD33	CECR1	CLEC10A	CLEC4A	CSF1R	FCER1G	FCGR2A	FCGR2B	FCGR3B	FGF7	FGL2	FPR3	GM2A	GPNMB	HK3	LIPA	MARCO	MMP12	MNDA	MRC1	MS4A6A	NPL	PLA2G7	PLEK	RAB23	RNASE6	SDC2	SLAMF8	SLC15A3	SLC38A6	SLC7A7	SPP1	TFEC	TM6SF1	TNFSF8	TRPV2
Th1	31	ADAM8	CCR5	CD151	CD48	CD52	CD53	CD6	CD68	CD7	CD96	CD97	EBI3	GPR84	ICAM1	ICAM3	IGSF6	IL7R	ITGA4	ITGAM	ITGAX	ITGB2	ITGB4	ITGB7	LTA	LTB	METRNL	P2RX5	TBX21	TNFRSF1A	TNFRSF9	TRAT1
Th17	26	ABP1	B4GALNT4	C2CD4A	C2CD4B	CA2	CCDC65	CEACAM3	CHRM3	DOC2B	F12	FURIN	GPR25	IL17A	IL17C	IL17F	IL17RC	IL17RE	IL23A	ILDR1	LONRF3	LTK	MOCOS	SH2D6	TNIP2	TRAF3IP2	YBX2
Th2	25	ASB2	CALD1	CCR2	CSRP2	DAPK1	DLC1	DNAJC12	DUSP6	GATA3	GNAI1	HTR2B	LAMP3	NRP2	OSBPL1A	PDE4B	PHLDA1	PLA2G4A	RAB27B	RBMS3	RNF125	SIGLEC10	SKAP1	SMAD2	TMPRSS3	UBASH3A
Extracellular matrix 1	953	FRAS1	ECM2	ECM1	MEPE	BMPER	VWF	MUC5B	SSPOP	OTOG	MUC2	OTOGL	MUC5AC	MUC6	ZAN	FCGBP	FREM2	FREM1	FREM3	FAM20C	EFEMP1	EFEMP2	SULF1	SULF2	LACRT	SOD3	MGP	IMPG2	MATN1	MMP23B	MMP20	MXRA5	MMP21	IMPG1	MMP19	MMP28	MMP24	MMP16	MMP15	MMP26	COMP	MMP27	MMP17	MMP25	MMP9	MMP14	MMP10	MXRA7	MMP13
Extracellular matrix 2	568	A1BG	CDH2	LRRC3C	GPC6	EDIL3	ENAM	CDH13	PRG4	ANGPTL7	LRRC17	ENSG00000278817	LAMC3	CRISP3	PRG3	SPON2	SPON1	LRRN2	FBLN5	MARCOL	POSTN	CTSC	HPSE	FGL2	MMP24	CHAD	KERA	ADAMTS13	ADAMTS8	ADAMTS5	EMILIN1	CHI3L1	ADAMTS7	ADAMTS6	ELFN2	VASN	CTHRC1	LRRC3B	CLC	MMP21	CLU	SERPINA3	LRIG3	CMA1	NTN5	PODN	COL1A1	COL1A2	COL2A1
Fibroblast activation	25	LTBP2	COL5A2	SPARC	COL1A2	COL1A1	LGALS1	TIMP1	TNC	FN1	TPM1	ELN	THBS1	COL3A1	FBN1	FSTL1	ACTA2	COL5A1	COL12A1	WISP1	COL4A2	SERPINH1	PPIC	ACTN1	TAGLN	COL6A3
TGFb Signaling	28	ACVR1	APC	ARID4B	BCAR3	BMP2	BMPR1A	BMPR2	CDH1	CDK9	CDKN1C	CTNNB1	ENG	FKBP1A	FNTA	FURIN	HDAC1	HIPK2	ID1	ID2	ID3	IFNGR2	JUNB	KLF10	LEFTY2	LTBP2	MAP3K7	NCOR2	NOG
Lipofibroblast	10	LIMCH1	GYG	MACF1	MFAP4	NPNT	WNT2	COL13A1	INMT	FGF10	TCF21
Myofibroblast	21	ACTG2	SYNPO2	CNN1	DES	HHP	ACTA2	TAGLN	MYH11	PDGFRA	TGFB1	ADIRF	CRIP1	MCAM	FAM129A	CLU	ASPN	WIF1	ITGBL1	MEF2C	ID4	TSC22D1
SMC	5	ACTG2	SYNPO2	CNN1	DES	HHP
Myofibroblast related	5	ACTA2	TAGLN	MYH11	PDGFRA	TGFB1
Myofibroblast high	11	ADIRF	CRIP1	MCAM	FAM129A	CLU	ASPN	WIF1	ITGBL1	MEF2C	ID4	TSC22D1
Matrix_Features	5	COL1A1	COL1A2	COL3A1	FN1	ACTA2
Oxidative stress	205	ABL1	ADAM9	ADPRS	AGAP3	AIFM1	AKR1C3	AKT1	ANKZF1	ANXA1	APEX1	APOA4	APOD	APOE	APTX	AQP1	AREG	ARG1	ATP7A	AXL	BAD	BAK1	BCL2	BECN1	BMP7	BNIP3	BTK	CAMKK2	CAPN2	CASP3	CAT	CCS	CD36	CDK1	CHUK	COA8	COL1A1	CRK	CRYAB	CRYGD	CYP1B1	CYP2E1	DDR2	DHFR	DHFRP1	ECT2	EDN1	EGFR	ENDOG
Mitochondrial transport	189	BCL2L11	TOMM6	TIMM23		SAE1	TIMM23B	HUWE1	PPIF	BCAP31	SLC25A13	TIMM17B	ARIH2	TIMM17A	ACAA2	TOMM40	HAX1	TIMM44	PITRM1	MTX2	STARD3	TOMM34	THEM4	UBE2J2	LRRK2	CNP	MTERF4	DNAJC19	CHCHD4	GRPEL2	CPT1A	CPT1B	CPT2	ATF2	ROMO1	CSNK2A2	SLC25A10	TRMT10B	C11orf65	UBL4B	TIMM8A	IMMP1L	NAIF1	EYA2	ABLIM3	PMPCA	SIRT4	ABCB10	HEBP2
Mitochondrial respiratory chain	24	BCS1L	COX15	MT-ND1	NDUFA1	NDUFA13	NDUFA2	NDUFA6	NDUFA9	NDUFAB1	NDUFB6	NDUFS1	NDUFS2	NDUFS3	NDUFS4	NDUFS7	NDUFS8	NDUFV1	NNT	OXA1L	SDHA	SURF1	UQCRB	UQCRC1	UQCRH
Response to stress	509	ABCF1	ABL1	ACHE	ACVRL1	ADM	ADORA1	ADORA2A	ADORA3	AFAP1L2	AGER	AHR	AHSA1	AHSG	AIF1	AIFM1	AKR1B1	AKT1	ALAS2	ALB	ALKBH1	ALOX15	ALOX5AP	AMFR	ANG	ANGPTL7	ANXA1	AOAH	AOC3	AOX1	APC	APCS	APEX1	APOA4	APOA5	APOL3	APTX	AQP9	ARNT2	ASF1A	ASNS	ATF4	ATF6	ATM	ATOX1	ATR	ATRIP	ATRX	ATXN3
Pro_oxidant	36	ACOX1	ACOX3	AOC1	AOC2	AOC3	AOX1	CYBA	CYBB	DAO	DDO	DUOX1	DUOX2	GFER	HAO1	HAO2	IL4I1	LOX	MAOA	MAOB	MPO	NCF2	NOS1	NOS2	NOS3	NOX1	NOX3	NOX4	NOX5	PAOX	PCYOX1	PIPOX	PNPO	QSOX1	QSOX2	SMOX	SUOX
Oxidative_response	33	ANGPTL7	APOA4	APTX	ATOX1	CYGB	CYP1A1	DGKK	DHCR24	DUSP1	GCLM	GLRX2	IPCEF1	MGST1	MSRA	MT1X	NFE2L2	NFIX	NFKB1	NUDT1	OXSR1	PDLIM1	PNKP	PRNP	RNF7	S100A7	S100A8	S100A9	SCARA3	SGK2	SGK3	SP1	SRXN1	STK25
Antioxidant	56	CAT	CTH	DRD1	DRD2	DRD3	DRD4	DRD5	ERCC1	ERCC2	ERCC3	ERCC6	ERCC8	FGF5	FOS	GCLC	GPX1	GPX3	GPX4	GSR	GSS	GSTA1	GSTM1	GSTM3	GSTP1	GSTT1	GSTT2	HMOX1	HMOX2	JUNB	MAPK10	MAPK14	MTHFR	NDUFA12	NDUFA6	NDUFB4	NDUFS2	NDUFS8	NQO1	PARK7	PON1	PON2	PPARGC1A	PRDX2	PRDX5	PRDX6	SELENOP	SELENOS	SESN2
[truncated: 905 more columns]

## Sheet: Table S4
Characteristics of patients included in D#1 and D#2 from the LTRC
	D#1			D#2
	n	mean	SD	n	mean	SD	p-value
Demographics
Age	100	65.16	8.2	34	62.44	8.72	0.102623
Weight (kg)	102	89.91	17.65	34	83.61	17.59	0.0730955
BMI (Kg/m2)	102	30.57	5.35	34	28.61	5.36	0.0676085
packyear	66	26.23	22.04	19	23.99	17.71	0.685451
quityears	66	22.39	13.64	18	20.37	15.18	0.587092
Lung function
Predicted DLCO	102	29.82	5.34	34	30.36	5.03	0.606586
Predicted FEV1	102	71.5	17.63	34	66.94	19.67	0.206899
Predicted FVC	102	64.73	16.61	34	59.71	17.86	0.136607
FEV1/FVC	102	0.83	0.06	34	0.85	0.07	0.39579
CT scan
Lower Atenuation areas	51	5.08	3.41	23	4.33	4.84	0.448748
Ground Glass Opacity	51	14.71	13.34	23	19.74	14.15	0.145492
Honeycombing	51	1.23	1.68	23	1.74	2.81	0.333727
Normal	51	50.44	14.91	23	48.59	14.54	0.61949
Reticular Densities	51	4.27	3.22	23	4.3	2.83	0.969858
Vessels	51	5.42	1.95	23	5.95	1.85	0.277513

## Sheet: Table S5
Differences in the immune signatures on D1 GSVA
	Cluster 1			Cluster 2
	n	mean	SD	n	mean	SD	p-value
Central memory CD8	55	0.22	0.24	47	-0.3	0.18	6.33926e-21
Th1	55	0.25	0.28	47	-0.34	0.25	4.28328e-19
Cytotoxic cells	55	0.28	0.33	47	-0.4	0.3	1.6775e-18
NK	55	0.26	0.26	47	-0.28	0.27	6.69758e-18
Treg	55	0.21	0.24	47	-0.24	0.19	1.30072e-17
MDSC	55	0.2	0.24	47	-0.25	0.21	1.23535e-16
T cells	55	0.21	0.27	47	-0.28	0.23	3.6425e-16
Central memory CD4	55	0.18	0.27	47	-0.28	0.24	9.2672e-15
Effector memory CD8	55	0.14	0.26	47	-0.24	0.16	3.57975e-14
Neutrophils	55	0.22	0.33	47	-0.31	0.34	1.65908e-12
DC	55	0.18	0.2	47	-0.19	0.26	1.97446e-12
Macrophages	55	0.17	0.26	47	-0.2	0.24	1.81532e-11
NKT	55	0.17	0.35	47	-0.31	0.28	1.95658e-11
TGD	55	0.23	0.32	47	-0.24	0.33	1.05564e-10
Immature B cells	55	0.19	0.33	47	-0.27	0.32	1.68779e-10
Monocytes	55	0.21	0.31	47	-0.23	0.35	1.29872e-09
Activated B cells	55	0.19	0.37	47	-0.27	0.35	6.05086e-09
Th2	55	0.12	0.24	47	-0.16	0.21	2.14803e-08
TFH	55	0.17	0.36	47	-0.2	0.32	4.66024e-07
Mast cells	55	0.13	0.28	47	-0.09	0.28	0.000129449
Memory B cells	55	0.11	0.31	47	-0.11	0.26	0.000152671
Eosinophil	55	0.08	0.22	47	-0.08	0.25	0.000862489
Effector memory CD4	55	-0.11	0.37	47	0.1	0.36	0.00578104
iDC	55	0.08	0.28	47	-0.08	0.29	0.00598403
mDC	55	0.1	0.47	47	-0.15	0.47	0.00852461
Activated CD8	55	-0.05	0.38	47	0.08	0.35	0.0630633
pDC	55	-0.03	0.26	47	0.06	0.25	0.081818
NK56 dim	55	0.01	0.36	47	-0.04	0.29	0.39077
Th17	55	-0.01	0.23	47	0.02	0.22	0.50374
Activated CD4	55	0.01	0.44	47	-0.02	0.43	0.78498
NK56 bright	55	0.02	0.33	47	0	0.32	0.790726

## Sheet: Table S6
Differences in the immune signatures and clinical characteristics on D2 GSVA
	Cluster 1			Cluster 2
	n	mean	SD	n	mean	SD	p-value
Age	19	61.68	10.39	13	63.77	6.64	0.528254
Weight (kg)	19	84.65	19.61	13	82.9	16.35	0.793406
BMI	19	28.96	4.7	13	28.56	6.65	0.843548
packyear	12	25.31	20.62	7	21.71	12.35	0.681762
quityears	11	19.57	16.54	7	21.63	13.92	0.788783
Lung function test
Predicted DLCO	19	30.07	5.85	13	30.37	4.12	0.877644
Predicted FEV1	19	61.32	19.88	13	77.15	16.74	0.0252613
Predicted FVC	19	54.68	16.27	13	69.77	16.66	0.016088
FEV1/FVC	19	0.84	0.08	13	0.84	0.06	0.901206
CT scan
Lower Atenuation areas	13	2.79	3.48	8	7.77	5.57	0.0202639
Ground Glass Opacity	13	25.82	14.01	8	7.86	6.7	0.00319359
Honeycombing	13	1.2	1.4	8	2.86	4.39	0.217128
Normal	13	50.04	12.09	8	43.09	18.15	0.30339
Reticular Densities	13	4.69	2.57	8	4.18	3.52	0.702962
Vessels	13	6.71	1.64	8	4.97	1.93	0.039637
GSVA populations
MDSC	19	0.24	0.2	13	-0.32	0.13	1.05867e-09
Monocytes	19	0.28	0.3	13	-0.43	0.15	7.17307e-09
TGD	19	0.27	0.27	13	-0.4	0.28	1.516e-07
DC	19	0.21	0.2	13	-0.27	0.19	1.53849e-07
Treg	19	0.21	0.24	13	-0.27	0.18	7.95253e-07
T cells	19	0.22	0.24	13	-0.27	0.26	7.34751e-06
Th1	19	0.24	0.26	13	-0.31	0.32	8.00505e-06
iDC	19	0.18	0.25	13	-0.24	0.21	2.70058e-05
Macrophages	19	0.16	0.23	13	-0.23	0.21	3.39292e-05
Neutrophils	19	0.28	0.32	13	-0.31	0.37	3.58677e-05
Effector memory CD8	19	0.18	0.23	13	-0.22	0.25	6.14948e-05
NK	19	0.17	0.33	13	-0.29	0.19	9.36834e-05
Cytotoxic cells	19	0.22	0.38	13	-0.3	0.32	0.000353274
Central memory CD8	19	0.21	0.26	13	-0.16	0.29	0.000611802
NKT	19	0.23	0.35	13	-0.26	0.37	0.000702181
NK56 bright	19	0.21	0.35	13	-0.26	0.38	0.00127257
Central memory CD4	19	0.15	0.32	13	-0.17	0.28	0.00681843
Th2	19	0.13	0.26	13	-0.08	0.18	0.0187865
Activated CD4	19	0.14	0.43	13	-0.21	0.35	0.0205237
Eosinophil	19	0.09	0.23	13	-0.09	0.26	0.0469033
Mast cells	19	0.1	0.23	13	-0.1	0.29	0.0470761
Memory B cells	19	0.07	0.32	13	-0.11	0.21	0.088276
TFH	19	0.08	0.35	13	-0.14	0.35	0.0928919
pDC	19	-0.1	0.35	13	0.08	0.27	0.121074
Immature B cells	19	0.08	0.36	13	-0.13	0.46	0.152999
NK56 dim	19	0.05	0.28	13	-0.09	0.44	0.249727
Activated B cells	19	0.05	0.41	13	-0.07	0.53	0.478892
Th17	19	-0.05	0.24	13	0.01	0.25	0.48579
Effector memory CD4	19	-0.09	0.41	13	0.01	0.49	0.518616
mDC	19	0	0.29	13	0.04	0.41	0.718715
Activated CD8	19	-0.03	0.48	13	-0.07	0.37	0.762292
Categorical variables
Playing sports or games (1=True, 2=False)	20	1.05 (0.22)		17	1.35 (0.49)		0.018
Not in control of my respiratory problem (1=True, 2=False)	20	1.15 (0.37)		17	1.53 (0.51)		0.013

## Sheet: Table S7
Clinical differences and GSV scores across IPF groups on D1 filtered by upper lobes
	Cluster 1			Cluster 2
	n	mean	SD	n	mean	SD	p-value
Age	13	65.92	7.14	8	69.88	4.36	0.175982
Weight (kg)	13	96.67	18.51	8	80.8	15.77	0.0585553
BMI	13	32.37	5.37	8	28.28	6.76	0.141105
packyear	9	20.54	19.19	4	39.95	23.63	0.143323
quityears	9	31.61	13.34	4	23.2	12.83	0.311769
Lung function test
Predicted DLCO	13	30.55	5.64	8	28.16	4.82	0.331578
Predicted FEV1	13	71.23	13.07	8	80.62	13.54	0.131034
Predicted FVC	13	64.92	10.23	8	69.5	13.95	0.396464
FEV1/FVC	13	0.82	0.05	8	0.87	0.06	0.0553358
CT scan
Lower Atenuation areas	5	3.16	2.87	4	4.48	4.09	0.584959
Ground Glass Opacity	5	15.37	13.95	4	21.77	17.74	0.562238
Honeycombing	5	0.48	0.29	4	1.91	1.57	0.0818407
Normal	5	61.73	12.65	4	48.83	10.81	0.150061
Reticular Densities	5	2.66	1.04	4	5.44	1.24	0.00788364
Vessels	5	5.01	0.64	4	6.27	0.89	0.0426377
GSVA populations
Treg	13	0.29	0.13	8	-0.27	0.2	2.48242e-07
Central memory CD8	13	0.28	0.23	8	-0.34	0.16	2.15766e-06
NK	13	0.38	0.15	8	-0.23	0.29	4.05733e-06
DC	13	0.27	0.1	8	-0.17	0.29	8.20098e-05
Monocytes	13	0.25	0.32	8	-0.37	0.25	0.000210532
Neutrophils	13	0.14	0.3	8	-0.39	0.17	0.000228586
Macrophages	13	0.23	0.22	8	-0.25	0.28	0.000380298
Th1	13	0.34	0.26	8	-0.23	0.37	0.000437695
MDSC	13	0.14	0.19	8	-0.25	0.25	0.00055131
TGD	13	0.29	0.25	8	-0.18	0.33	0.00143631
Cytotoxic cells	13	0.31	0.28	8	-0.24	0.39	0.00146386
T cells	13	0.26	0.29	8	-0.22	0.3	0.00200988
Central memory CD4	13	0.17	0.27	8	-0.25	0.24	0.00203402
NKT	13	0.25	0.32	8	-0.3	0.39	0.00243172
Immature B cells	13	0.23	0.32	8	-0.22	0.35	0.00622078
Effector memory CD8	13	0.09	0.24	8	-0.23	0.26	0.00915569
TFH	13	0.23	0.36	8	-0.16	0.32	0.0206395
Mast cells	13	0.27	0.22	8	-0.04	0.35	0.0215139
Activated B cells	13	0.24	0.32	8	-0.2	0.49	0.0222177
Th2	13	0.18	0.24	8	-0.06	0.28	0.0498935
iDC	13	0.08	0.22	8	-0.1	0.27	0.120691
Memory B cells	13	0.17	0.29	8	-0.04	0.31	0.123585
Eosinophil	13	-0.01	0.21	8	-0.14	0.21	0.181154
NK56 bright	13	0.08	0.29	8	-0.04	0.4	0.428633
mDC	13	0.11	0.5	8	-0.06	0.45	0.429508
Activated CD4	13	0.13	0.42	8	0	0.49	0.525986
NK56 dim	13	-0.13	0.35	8	-0.05	0.36	0.646627
pDC	13	-0.04	0.19	8	0	0.27	0.743756
Effector memory CD4	13	-0.16	0.4	8	-0.11	0.44	0.810912
Th17	13	-0.02	0.27	8	0	0.19	0.84162
Activated CD8	13	0.02	0.39	8	0.05	0.36	0.856208
Categoric variables
Do not expect better (1=True, 2=False)	13	1.38 (0.52)		8	1.91 (0.30)		0.011
Duration good days (1=None, 2=One or two, 3=Three or four, 4=Nearly every day, 5=Every day)	13	4.38 (0.74)		8	3.00 (1.67)		0.045

## Sheet: Table S8
Clinical differences and GSVA score across IPF groups on D1 filtered by lower lobes
	Cluster 1			Cluster 2
	n	mean	SD	n	mean	SD	p-value
Age	41	62.95	9.13	38	66.29	7.6	0.0827245
Weight(kg)	42	85.79	16.3	39	93.98	17.84	0.0338511
BMI	42	29.89	4.75	39	31.17	5.59	0.27043
packyear	30	30.82	25.44	23	20.07	16.01	0.0821165
quityears	30	17.96	12.01	23	24.44	14.36	0.0797035
Lung function test
Predicted DLCO	42	29	5.72	39	30.8	4.85	0.132782
Predicted FEV1	42	69.05	17.58	39	72.36	19.48	0.423825
Predicted FVC	42	62.6	16.1	39	65.97	19.32	0.393847
FEV1/FVC	42	0.84	0.06	39	0.83	0.06	0.439419
CT scan
Lower Atenuation areas	25	4.62	3.52	17	6.45	3	0.0877464
Ground Glass Opacity	25	17.51	14.72	17	8.74	7.8	0.0303576
Honeycombing	25	1.35	2.11	17	1.12	1.16	0.686578
Normal	25	51.08	13.42	17	46.56	17.49	0.348504
Reticular Densities	25	4.43	3.22	17	4.24	3.9	0.865184
Vessels	25	5.74	2.17	17	4.88	1.97	0.197405
GSVA populations
Activated B cells	42	0.17	0.39	39	-0.28	0.32	1.70564e-07
Th1	42	0.23	0.29	39	-0.36	0.22	4.28795e-16
Cytotoxic cells	42	0.27	0.35	39	-0.44	0.27	6.1652e-16
Central memory CD8	42	0.2	0.25	39	-0.29	0.19	1.4363e-15
T cells	42	0.19	0.26	39	-0.29	0.21	7.74717e-14
MDSC	42	0.21	0.25	39	-0.25	0.21	8.62844e-14
NK	42	0.23	0.28	39	-0.3	0.26	3.26459e-13
Effector memory CD8	42	0.16	0.26	39	-0.24	0.13	9.91362e-13
Central memory CD4	42	0.18	0.28	39	-0.29	0.24	2.89381e-12
Treg	42	0.18	0.26	39	-0.24	0.19	3.01573e-12
Neutrophils	42	0.25	0.34	39	-0.3	0.36	7.44902e-10
NKT	42	0.15	0.36	39	-0.31	0.26	5.215e-09
DC	42	0.15	0.21	39	-0.19	0.26	6.18497e-09
Immature B cells	42	0.17	0.33	39	-0.27	0.31	1.78266e-08
Macrophages	42	0.16	0.27	39	-0.2	0.23	2.07278e-08
TGD	42	0.21	0.34	39	-0.25	0.34	3.38621e-08
Th2	42	0.1	0.24	39	-0.18	0.19	2.16887e-07
Monocytes	42	0.2	0.3	39	-0.2	0.36	9.71292e-07
TFH	42	0.15	0.36	39	-0.2	0.33	1.39663e-05
Memory B cells	42	0.09	0.31	39	-0.13	0.25	0.000867343
Eosinophil	42	0.11	0.22	39	-0.07	0.26	0.0014082
Mast cells	42	0.08	0.28	39	-0.11	0.27	0.00294028
Effector memory CD4	42	-0.09	0.36	39	0.14	0.34	0.00365891
mDC	42	0.1	0.47	39	-0.16	0.47	0.0134735
iDC	42	0.08	0.3	39	-0.08	0.29	0.0214648
Activated CD8	42	-0.07	0.37	39	0.09	0.35	0.0446433
pDC	42	-0.02	0.28	39	0.08	0.25	0.0947782
NK56 dim	42	0.05	0.35	39	-0.04	0.27	0.170127
Th17	42	-0.01	0.22	39	0.02	0.23	0.539133
NK56 bright	42	0	0.34	39	0.01	0.3	0.879677
Activated CD4	42	-0.03	0.44	39	-0.02	0.42	0.905825
Categorical variables
Inhaled steroids (0=No, 1=Yes)	49	0.23 (0.42)		32	0.06 (0.25)		0.048
Gender (1=Male, 2=Female)	49	1.41 (0.50)		32	1.19 (0.40)		0.038
Cough disturbs sleep (1=True, 2=False)	49	1.54 (0.50)		32	1.84 (0.37)		0.005
Long time to wash or dress (1=True, 2=False)	49	1.60 (0.49)		32	1.91 (0.30)		0.003
Cigarette hx, at least 100 in your lifetime (0=No, 1=Yes)	49	0.75 (0.44)		32	0.53 (0.51)		0.043

## Sheet: Table S9
Clinical and GSVA score comparison between upper and lower lobe
	Lower Lobe		Upper Lobe		p-value
	n	N=81		N=21
Cluster:					0.563
Cluster immune1 (%)	42	51.9	13	61.9
Cluster immune2 (%)	39	48.1	8	38.1
CT scan
Lower Atenuation areas_Peripheral (cm2)	81	2.85 [1.27;4.67]	21	2.67 [1.75;5.95]	0.64
Lower Atenuation areas_Central (cm2)	81	3.04 [1.87;6.42]	21	2.47 [1.34;5.45]	0.83
Ground Glass Opacity Peripheral (cm2)	81	27.5 [13.1;36.3]	21	8.76 [2.99;13.6]	0.022
Ground Glass Opacity Central (cm2)	81	4.52 [1.09;24.0]	21	1.56 [0.45;3.56]	0.109
Honeycombing Peripheral (cm2)	81	1.04 [0.45;2.04]	21	0.48 [0.18;0.78]	0.154
Honeycombing Central (cm2)	81	0.66 [0.35;1.95]	21	0.14 [0.11;0.66]	0.042
Normal Peripheral (cm2)	81	43.5 (18.0)	21	60.4 (13.2)	0.005
Normal Central (cm2)	81	51.4 (20.5)	21	67.4 (19.5)	0.048
Reticular Densities Peripheral (cm2)	81	7.70 [4.70;12.9]	21	2.96 [1.64;5.01]	0.003
Reticular Densities Central (cm2)	81	2.30 [0.89;6.21]	21	1.05 [0.11;2.42]	0.057
Vessels Peripheral (cm2)	81	4.21 [2.62;6.26]	21	2.87 [2.23;3.41]	0.079
VesselsCentral (cm2)	81	7.37 [6.02;9.75]	21	5.94 [5.10;6.73]	0.04
GSVA populations
Mast cells	81	-0.01 [-0.27;0.26]	21	0.26 [-0.02;0.42]	0.013
NK	81	-0.01 [-0.37;0.28]	21	0.31 [-0.25;0.41]	0.06
Th1	81	-0.12 [-0.41;0.28]	21	0.20 [-0.16;0.43]	0.066
Th2	81	-0.03 (0.26)	21	0.09 (0.28)	0.07
DC	81	0.02 [-0.25;0.21]	21	0.25 [0.04;0.32]	0.083
Effector memory CD4	81	0.04 [-0.28;0.26]	21	-0.27 [-0.47;0.14]	0.092
Eosinophil	81	0.02 (0.25)	21	-0.06 (0.21)	0.133
Cytotoxic cells	81	-0.14 [-0.49;0.41]	21	0.20 [-0.18;0.41]	0.153
T cells	81	-0.03 [-0.33;0.18]	21	0.21 [-0.21;0.36]	0.156
NK56 dim	81	0.05 [-0.25;0.24]	21	-0.13 [-0.36;0.00]	0.158
Treg	81	-0.04 [-0.27;0.17]	21	0.12 [-0.09;0.33]	0.166
Memory B cells	81	-0.01 (0.30)	21	0.09 (0.31)	0.174
TGD	81	0.02 [-0.40;0.32]	21	0.16 [-0.12;0.32]	0.219
Activated CD4	81	-0.09 [-0.36;0.32]	21	0.16 [-0.28;0.44]	0.276
Immature B cells	81	-0.11 [-0.40;0.30]	21	0.00 [-0.26;0.39]	0.276
NKT	81	-0.14 [-0.41;0.25]	21	0.03 [-0.36;0.41]	0.276
TFH	81	0.01 [-0.33;0.27]	21	0.05 [-0.16;0.48]	0.28
Macrophages	81	-0.04 [-0.26;0.25]	21	0.06 [-0.12;0.30]	0.291
pDC	81	0.10 [-0.19;0.24]	21	-0.09 [-0.15;0.12]	0.311
Central memory CD8	81	-0.07 [-0.32;0.22]	21	0.03 [-0.24;0.32]	0.315
Activated B cells	81	-0.12 [-0.39;0.33]	21	0.25 [-0.38;0.43]	0.365
Central memory CD4	81	-0.04 [-0.35;0.23]	21	-0.05 [-0.25;0.18]	0.42
mDC	81	0.00 [-0.44;0.37]	21	0.10 [-0.42;0.36]	0.571
Neutrophils	81	-0.04 [-0.44;0.41]	21	-0.16 [-0.27;0.26]	0.634
NK56 bright	81	0.00 (0.32)	21	0.03 (0.33)	0.703
Th17	81	0.00 (0.22)	21	-0.01 (0.24)	0.743
Activated CD8	81	0.09 [-0.33;0.30]	21	0.03 [-0.10;0.31]	0.782
iDC	81	0.00 (0.30)	21	0.01 (0.25)	0.878
Effector memory CD8	81	-0.10 [-0.26;0.14]	21	0.05 [-0.26;0.12]	0.924
MDSC	81	-0.03 [-0.32;0.30]	21	0.07 [-0.20;0.23]	0.977
Monocytes	81	0.06 [-0.26;0.33]	21	0.05 [-0.35;0.41]	0.983

[truncated: 3 more sheets: Table S10, Table S11, Table S12]
